# Supplementary material for: Achieving pure yellow, high-efficiency (EQE > 20%) electroluminescence from ultrathin emitting layer (0.6–2.0 nm) OLEDs having a rare aggregation-free heteroleptic platinum complex
Source: Royal Society of Chemistry journal article supplement (doi:10.1039/d0tc04958a), 2020-12-10
Supplement: d0tc04958a1.pdf [file d0tc04958a1.pdf]

## Electronic Supporting Information

### **Achieving pure yellow, high-efficiency (EQE > 20%) electroluminescence from ultrathin emitting-layer (0.6~2.0 nm) OLEDs having a rare aggregation-free heteroleptic platinum complex**

*Hagos Tesfay Kidanu,<sup>†,‡,§</sup> and Chin-Ti Chen<sup>\*,†</sup>*

<sup>†</sup> Institute of Chemistry, Academia Sinica, Taipei 11529, Taiwan, Republic of China.

<sup>‡</sup>Sustainable Chemical Science and Technology, Taiwan International Graduate Program (TIGP), Academia Sinica, Taipei 11529, Taiwan, Republic of China.

<sup>§</sup>Department of Applied Chemistry, National Chiao Tung University, Hsinchu 30050, Taiwan, Republic of China.

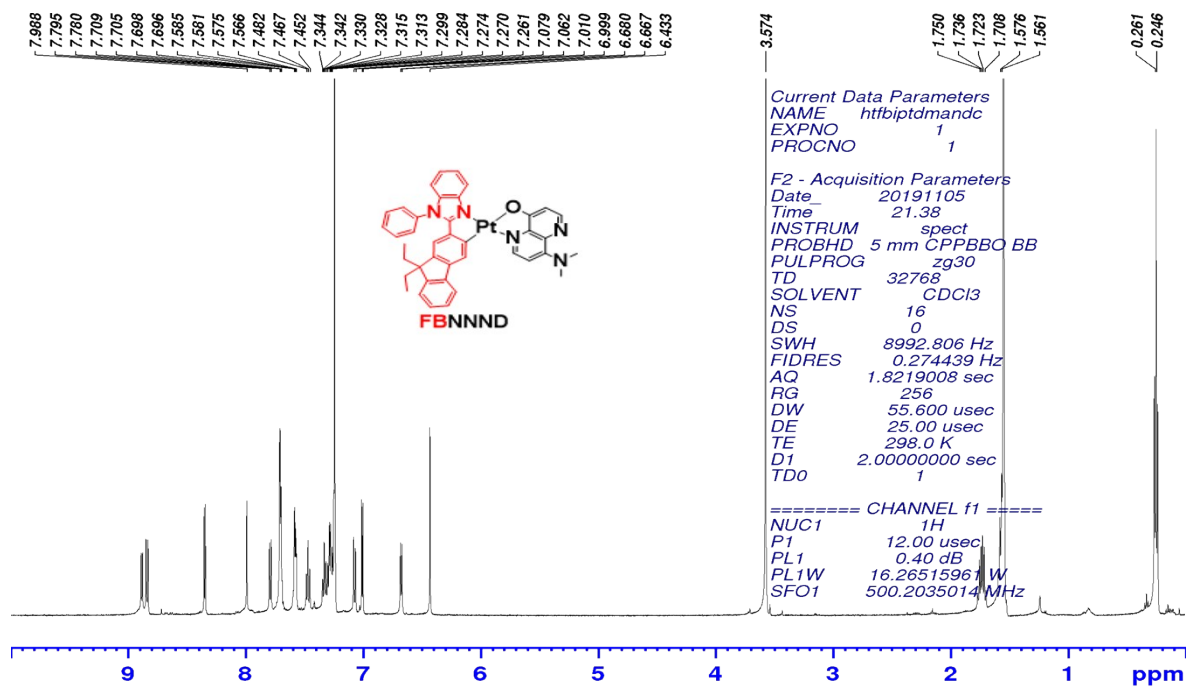

Figure S1. <sup>1</sup>H NMR spectrum of **FBNND** (400 MHz, CDCl<sub>3</sub>).

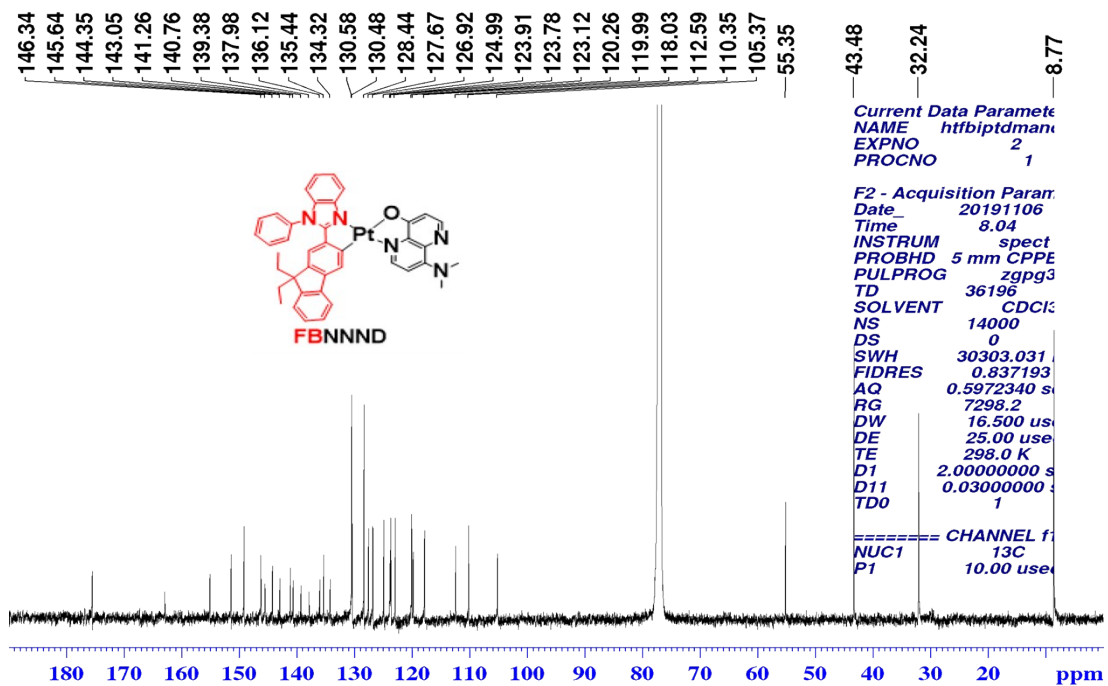

Figure S2. <sup>13</sup>C NMR spectrum of **FBNND** (125 MHz, CDCl<sub>3</sub>).

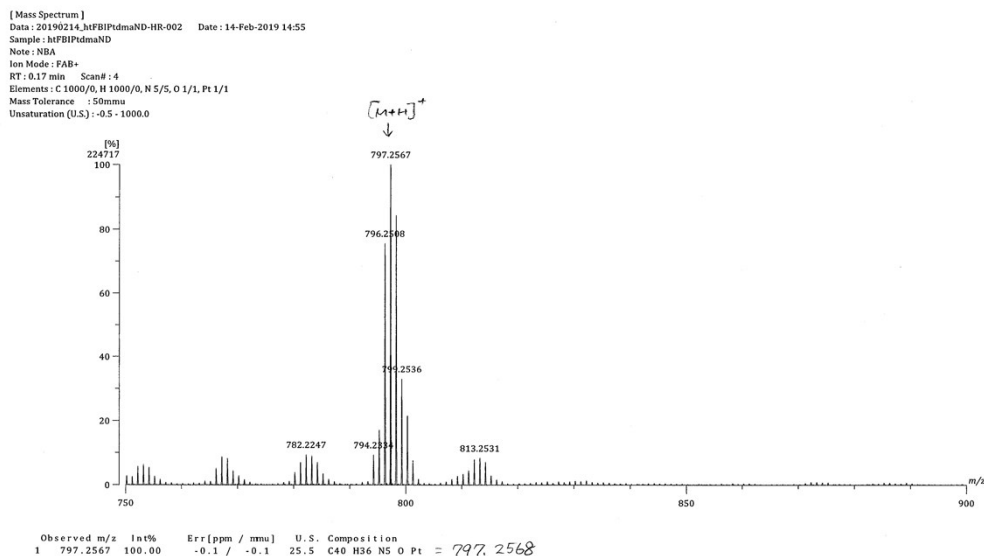

Figure S3. HR-MS spectrum of **FBNNND**.

Table S1. Comparison of selected geometric parameters of **FBNNND** theoretically and experimentally.

| <b>FBNNND</b>      | Selected bond lengths (Å) |           |            |            |           |        |
|--------------------|---------------------------|-----------|------------|------------|-----------|--------|
|                    | Pt-N(1)                   | Pt-C      | Pt-O       | Pt-N(qn)   |           |        |
| DFT <sup>a</sup>   | 2.028                     | 2.025     | 2.141      | 2.068      |           |        |
| X-ray <sup>b</sup> | 2.001                     | 2.020     | 2.081      | 2.047      |           |        |
| <b>FBNNND</b>      | Selected bond angles (°)  |           |            |            |           |        |
|                    | O-Pt-N(1)                 | N(1)-Pt-C | C-Pt-N(qn) | N(qn)-Pt-O | N1-Pt-Nqn | O-Pt-C |
| DFT <sup>a</sup>   | 96.83                     | 79.48     | 105.28     | 78.92      | 172.95    | 173.38 |
| X-ray <sup>b</sup> | 94.45                     | 79.95     | 104.96     | 80.78      | 174.26    | 173.77 |

<sup>a</sup> Results obtained by DFT calculation using b3lyp method. <sup>b</sup> Results obtained experimentally from the single crystal X-ray structure.

Table S2. Calculated wavelengths, and molecular orbitals character of the optical transitions for the studied **FBNNND** complex in dichloromethane solvent.

| States         | $\lambda$ (nm) | MO transition contributions                                     |
|----------------|----------------|-----------------------------------------------------------------|
| S <sub>1</sub> | 414.6          | HOMO → LUMO (64%)<br>HOMO-1 → LUMO (26%)<br>HOMO-2 → LUMO (10%) |
| S <sub>2</sub> | 397.0          | HOMO-1 → LUMO (64%)<br>HOMO → LUMO (28%)                        |
| T <sub>1</sub> | 516.0          | HOMO-1 → LUMO (59%)<br>HOMO → LUMO (27%)                        |
| T <sub>2</sub> | 502.0          | HOMO → LUMO+1 (53%)<br>HOMO → LUMO (32%)                        |

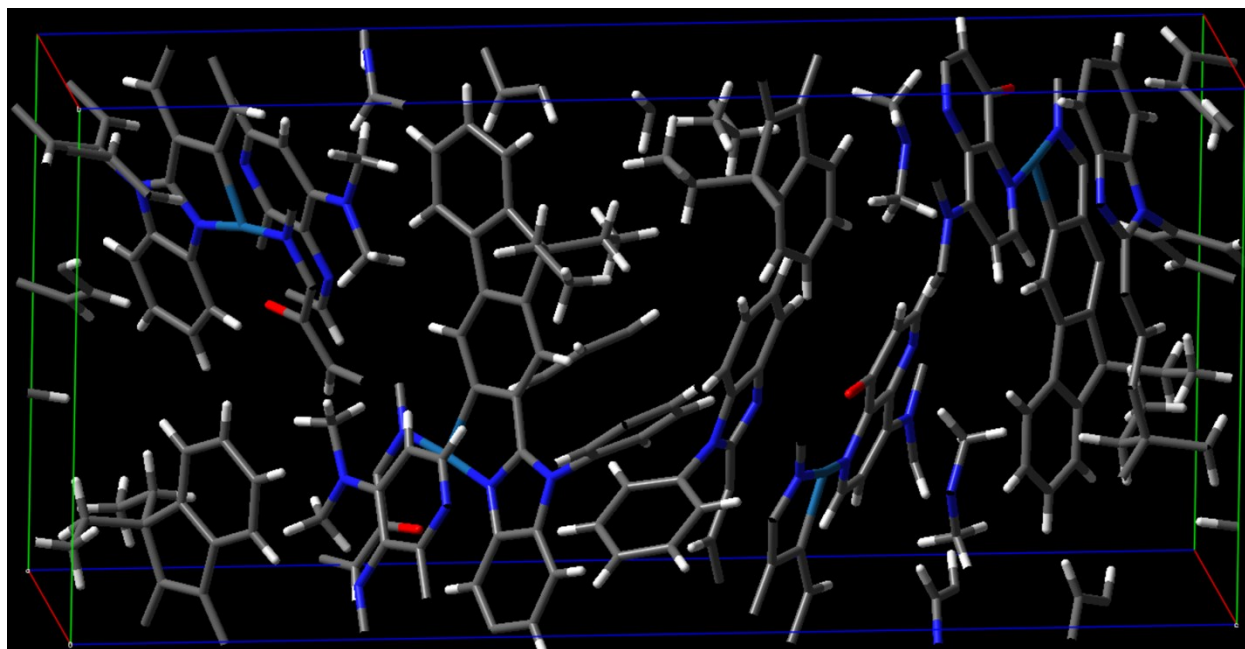

Figure S4 Molecular packing of **FBNNND** inside a unit cell.

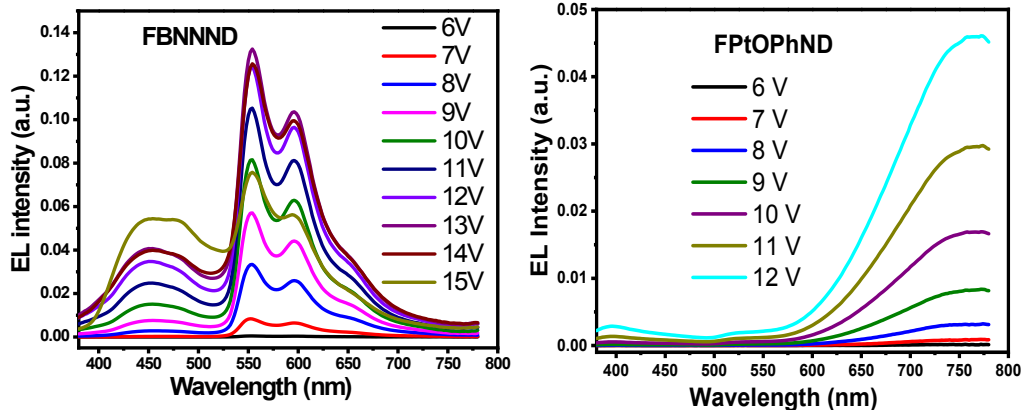

Figure S5 Voltage-dependent EL spectra of **FBNNND** OLED (1.0 nm ultrathin film) and **FPtOPhND** OLED (0.6 nm ultrathin film).

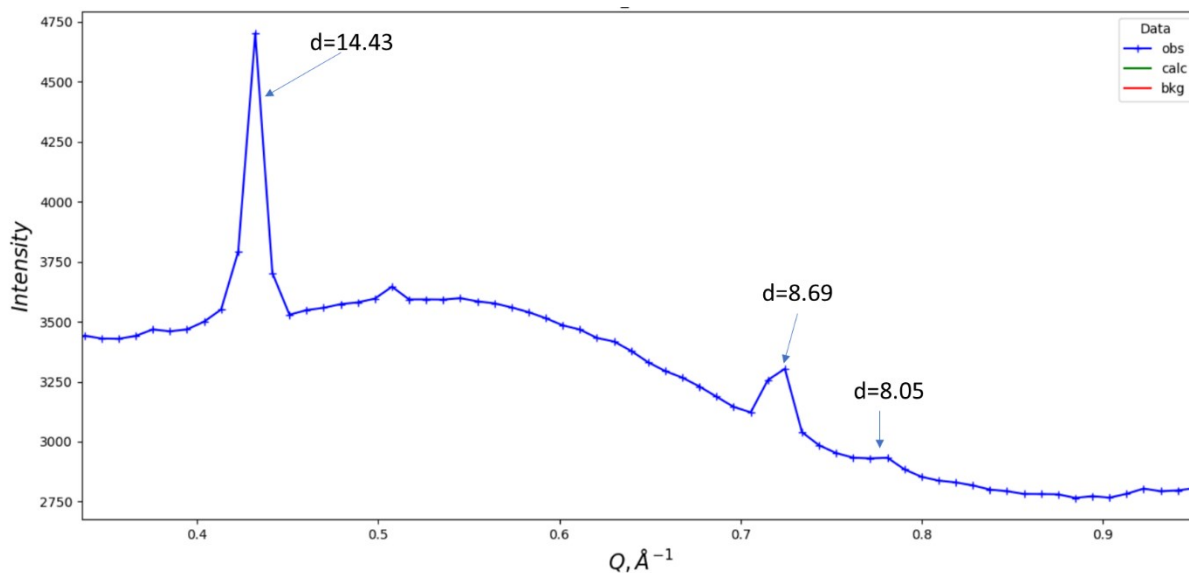

Figure S6 1D GIWAXS spectrum of **FBNNND** along the direction of  $Q_z$  (out-of-plane direction to the substrate) extracted from the corresponding 2D GIWAXS patterns (Figure 11). The corresponding  $d$ -spacing,  $d = 2\pi/Q_z$ .
